# Supplementary material for: Optimized nitrogen fertilizer application strategies under supplementary irrigation improved winter wheat (Triticum aestivum L.) yield and grain protein yield
Source: PeerJ. 2021 Jun 2;9:e11467. doi: 10.7717/peerj.11467 (PMC8179224; doi:10.7717/peerj.11467)
Supplement: Supplemental Information 1 — All measured data and the data of repeated determination. [file peerj-09-11467-s001.xls]

## Sheet: Sheet1
	Figure 1 Raw Data
	Pre	2016	2017
	Oct.	43	0
	Nov.	17.8	0.6
	Dec.	26.6	0.5
	Jan.	19.9	4.8
	Feb.	5.8	0.8
	Mar.	2.2	30.9
	Apr.	38.1	40.5
	May.	73.1	73.8
	Jun.	54.2	0
	Total	280.7	151.9
	Figure 2 Raw Data
	2016	NR activity							2017	NR activity
		N1	N2	N3	N4	N5				N1	N2	N3	N4	N5
	0d	209.52	212.95	214.08	211.65	209			0d	208.88	211.24	211.87	210.7	208.02
	0d	203.82	207.22	208.34	205.94	213.312			0d	203.19	215.52	216.15	214.99	202.35
	0d	215.21	218.68	219.82	217.37	214.69			0d	214.57	206.95	207.59	206.41	213.7
	7d	201.01	203.33	205.28	203.1	200.43			7d	202.58	201.09	202.02	199.95	201.37
	7d	191.41	193.71	198.64	196.48	193.84			7d	196.95	210.42	211.35	209.3	195.76
	7d	207.61	209.95	211.92	209.73	207.03			7d	211.21	209.75	210.69	208.6	209.99
	14d	163.64	176.42	185.35	169.26	161.77			14d	163.44	176.9	186.109	172.84	158.49
	14d	160.11	171.817	192.71	163.68	160.25			14d	154.9	168.31	176.49	164.26	149.96
	14d	167.18	181.03	181.99	175.84	163.29			14d	168.97	181.48	192.73	178.42	164.01
	21d	124.62	134.31	152.65	132.2	118.11			21d	120.85	135.07	153.17	131.26	116.27
	21d	124.22	130.86	147.17	128.7	127.71			21d	115.48	126.65	144.72	125.85	110.91
	21d	125.02	137.76	158.13	135.69	118.51			21d	126.22	140.49	161.62	136.68	121.64
	28d	90.23	105.74	126.64	101.54	89.36			28d	87.51	105.79	124.92	102.42	82.64
	28d	89.93	102.36	121.21	98.18	89.04			28d	82.13	100.38	116.47	97.01	77.27
	28d	90.57	109.13	132.07	104.91	89.68			28d	92.89	111.2	133.36	107.82	88.03
	35d	62.4	71.22	90.21	72.11	59.05			35d	55.66	70.86	90.06	69.85	54.89
	35d	60.16	67.94	84.92	71.84	56.83			35d	50.43	65.61	81.77	64.59	49.67
	35d	64.63	74.48	95.52	78.37	61.27			35d	60.89	76.11	98.35	75.11	60.11
	2016	GS acticity							2017	GS acticity
		N1	N2	N3	N4	N5				N1	N2	N3	N4	N5
	0d	419.52	449.6	454.8	433.04	413.52			0d	413.84	434.16	445.92	426.88	403.6
	0d	410.28	442.12	447.24	425.72	404.36			0d	404.76	424.84	436.44	417.64	391.52
	0d	428.68	457.08	462.36	440.28	422.6			0d	423	443.48	455.4	436.12	412.68
	7d	367.76	390.24	400.8	378.56	358.48			7d	346.56	367.84	371.84	356.4	342.64
	7d	353.08	381.32	391.8	369.8	347.88			7d	337.12	358.16	362.16	346.88	333.12
	7d	378.52	399.16	409.8	387.32	369.08			7d	356.08	377.52	381.52	365.92	352.08
	14d	285.36	314.96	343.64	312.4	280.72			14d	271.04	304.48	320.76	295.68	264.72
	14d	275.56	306.76	331.2	304.28	270.84			14d	260.32	296.52	308.64	287.64	254.08
	14d	295.24	323.08	356	320.6	290.52			14d	281.68	307.52	332.96	303.64	275.36
	21d	229.1	268.5	294.7	258.8	224.7			21d	217.1	252.6	281.9	245	210.1
	21d	219.7	260.8	282.7	251.2	215.4			21d	206.9	245.1	270.1	237.5	199.8
	21d	238.5	276.3	305.6	266.5	234			21d	227.3	260.2	293.6	252.5	220.3
	28d	129.5	157.5	198.6	152.7	125.7			28d	121.2	156.1	188.9	149.7	110.6
	28d	121.1	150.8	187.9	146.1	117.2			28d	111.8	149.5	178.2	143.2	101.4
	28d	138	164.2	209.4	159.3	134.1			28d	130.5	162.7	199.7	156.3	119.8
	35d	74.9	102.24	151.16	92.16	67.06			35d	75.32	94.96	130.3	92.72	72.38
	35d	67.06	96.26	140.9	86.18	59.22			35d	66.34	89.12	120.32	86.74	63.68
	35d	82.6	108.36	161.42	98.14	74.9			35d	84.16	100.94	140.56	98.7	81.22
	Figure 3 Raw Data
	2016	Free amino acid in flag leaf							2017	Free amino acid in flag leaf
		N1	N2	N3	N4	N5				N1	N2	N3	N4	N5
	0d	0.4793	0.4877	0.4964	0.4819	0.4747			0d	0.4626	0.4674	0.4749	0.4656	0.4562
	0d	0.4645	0.4728	0.4814	0.4671	0.46			0d	0.45	0.4547	0.4622	0.4589	0.4436
	0d	0.4941	0.5026	0.5114	0.4967	0.4894			0d	0.4752	0.4801	0.4876	0.4783	0.4688
	7d	0.5761	0.6157	0.6331	0.6089	0.5556			7d	0.531	0.5786	0.5976	0.5674	0.5234
	7d	0.5653	0.6045	0.6218	0.5978	0.545			7d	0.5207	0.5678	0.5866	0.5567	0.5132
	7d	0.5869	0.6269	0.6444	0.62	0.5662			7d	0.5413	0.5894	0.6086	0.5781	0.5336
	14d	0.4847	0.5237	0.5538	0.5112	0.471			14d	0.4715	0.504	0.5336	0.4961	0.4631
	14d	0.4749	0.5135	0.5433	0.5011	0.4613			14d	0.4618	0.494	0.5233	0.4861	0.4535
	14d	0.4945	0.5339	0.5643	0.5213	0.4807			14d	0.4812	0.5144	0.5439	0.5061	0.4727
	21d	0.4092	0.4655	0.4963	0.4515	0.386			21d	0.3898	0.4298	0.4584	0.4132	0.3779
	21d	0.4001	0.4558	0.4863	0.442	0.3771			21d	0.3809	0.4205	0.4488	0.4041	0.3691
	21d	0.4183	0.4752	0.5063	0.461	0.3949			21d	0.3987	0.4391	0.468	0.4223	0.3867
	28d	0.2346	0.2589	0.3095	0.2468	0.2293			28d	0.2205	0.2518	0.2857	0.2402	0.2133
	28d	0.2273	0.2513	0.2964	0.2393	0.222			28d	0.2133	0.2443	0.2778	0.2328	0.2062
	28d	0.242	0.2665	0.3226	0.2543	0.2366			28d	0.2277	0.2593	0.2936	0.2476	0.2204
	35d	0.1528	0.1651	0.1965	0.1625	0.1489			35d	0.1256	0.1491	0.1782	0.1462	0.1171
	35d	0.1463	0.1584	0.1847	0.1559	0.1424			35d	0.1193	0.1426	0.1666	0.1397	0.1109
	35d	0.1593	0.1718	0.1983	0.1591	0.1454			35d	0.1319	0.1556	0.1898	0.1527	0.1233
	2016	Free amino acid in grain							2017	Free amino acid in grain
		N1	N2	N3	N4	N5				N1	N2	N3	N4	N5
	7d	0.9278	0.9518	0.9595	0.9432	0.9007			7d	0.8702	0.9141	0.9264	0.8992	0.8645
	7d	0.9185	0.9423	0.9499	0.9338	0.8917			7d	0.8615	0.905	0.9171	0.8902	0.8559
	7d	0.9371	0.9613	0.9691	0.9526	0.9097			7d	0.8789	0.9232	0.9357	0.9082	0.8731
	14d	0.4914	0.5237	0.5299	0.5185	0.4776			14d	0.4562	0.504	0.5114	0.4906	0.4478
	14d	0.4865	0.5185	0.5246	0.5133	0.4728			14d	0.4516	0.499	0.5063	0.4857	0.4433
	14d	0.4963	0.5289	0.5352	0.5237	0.4824			14d	0.4608	0.509	0.5165	0.4955	0.4523
	21d	0.2237	0.2405	0.2534	0.2382	0.2195			21d	0.2188	0.2358	0.2494	0.2303	0.2132
	21d	0.2215	0.2381	0.2509	0.2358	0.2173			21d	0.2166	0.2334	0.2469	0.228	0.2111
	21d	0.2259	0.2429	0.2559	0.2406	0.2217			21d	0.221	0.2382	0.2519	0.2326	0.2153
	28d	0.1558	0.1699	0.1803	0.1664	0.1524			28d	0.1548	0.1673	0.1766	0.1641	0.1512
	28d	0.1542	0.1682	0.1785	0.1647	0.1509			28d	0.1533	0.1656	0.1748	0.1625	0.1497
	28d	0.1574	0.1716	0.1821	0.1681	0.1539			28d	0.1563	0.169	0.1784	0.1657	0.1527
	35d	0.1116	0.1226	0.1242	0.1192	0.1058			35d	0.1063	0.1169	0.1199	0.1152	0.1016
	35d	0.1105	0.1214	0.123	0.118	0.1047			35d	0.1052	0.1157	0.1187	0.114	0.1006
	35d	0.1127	0.1238	0.1254	0.1204	0.1069			35d	0.1074	0.1181	0.1211	0.1164	0.1026
	Figure 4 Raw Data
	2016	Accumulation of 1000-grain nitrogen in grains							2017	Accumulation of 1000-grain nitrogen in grains
		N1	N2	N3	N4	N5				N1	N2	N3	N4	N5
	7d	0.157	0.1543	0.1897	0.1789	0.1753			7d	0.1927	0.1925	0.2093	0.183	0.176
	7d	0.1554	0.1527	0.1828	0.1771	0.1735			7d	0.1908	0.1906	0.1972	0.1812	0.1743
	7d	0.1586	0.1558	0.1966	0.1807	0.177			7d	0.1947	0.1944	0.2214	0.1849	0.1778
	14d	0.421	0.4226	0.4785	0.4468	0.3882			14d	0.4253	0.4171	0.4622	0.3963	0.3764
	14d	0.4068	0.4084	0.4691	0.4323	0.3744			14d	0.4111	0.4029	0.4477	0.3824	0.3627
	14d	0.4352	0.4368	0.4879	0.4613	0.4021			14d	0.4396	0.4313	0.4767	0.4103	0.3702
	21d	0.7289	0.7585	0.8036	0.7573	0.692			21d	0.7022	0.7524	0.7927	0.7185	0.699
	21d	0.7116	0.7409	0.7906	0.7398	0.675			21d	0.6851	0.7349	0.7647	0.7013	0.682
	21d	0.7462	0.776	0.8167	0.7749	0.7089			21d	0.7192	0.7699	0.8206	0.7357	0.716
	28d	0.9165	0.9311	0.9871	0.9126	0.8589			28d	0.8424	0.9004	0.9436	0.8621	0.83
	28d	0.8973	0.9117	0.9722	0.8935	0.8403			28d	0.824	0.8714	0.9141	0.8435	0.8117
	28d	0.9357	0.9504	1	0.9317	0.8775			28d	0.8409	0.9195	0.973	0.8808	0.8483
	35d	1.0347	1.0463	1.1055	1.0221	0.9538			35d	0.8621	0.9182	0.9736	0.8875	0.8554
	35d	1.0144	1.0258	1.0895	1.0019	0.9343			35d	0.8435	0.899	0.9538	0.8686	0.8368
	35d	1.0551	1.0668	1.1216	1.0424	0.9733			35d	0.8807	0.9374	0.9933	0.9064	0.8739
	Figure 5 Raw Data
	2016	Grain yield		2017	Grain yield		2016	Grain protein yield			2017	Grain protein yield
	N1	7525.38		N1	6931.6		N1	1045.39			N1	948.49
	N1	7430.13		N1	6812.28		N1	1024.48			N1	929.52
	N1	7620.63		N1	7050.92		N1	1066.29			N1	967.46
	N2	7973.63		N2	7612.93		N2	1154.65			N2	1076.67
	N2	7873.89		N2	7506.8		N2	1131.55			N2	1055.14
	N2	8073.37		N2	7719.06		N2	1177.74			N2	1098.2
	N3	8395.74		N3	8015.84		N3	1192.16			N3	1115
	N3	8291.78		N3	7905.68		N3	1168.32			N3	1092.7
	N3	8499.7		N3	8126		N3	1216.03			N3	1137.3
	N4	7938.95		N4	7441.18		N4	1104.16			N4	1023.91
	N4	7839.56		N4	7336.77		N4	1082.08			N4	1003.43
	N4	8038.34		N4	7545.59		N4	1126.24			N4	1044.39
	N5	7225.8		N5	6999.88		N5	945.86			N5	900.18
	N5	7133.54		N5	6879.88		N5	926.94			N5	882.18
	N5	7318.06		N5	7119.88		N5	964.78			N5	918.18
	Table 1 Raw Data
	Treatments		Nitrogen accumulation amount in leaf kg/ha		Nitrogen accumulation amount in stem and sheath kg/ha		Nitrogen accumulation amount in spike axis and grain husk kg/ha
			Anthesis	Maturity	Anthesis	Maturity	Anthesis	Maturity
	2016	N1	82.5	18.5	103.7	44.2	29.7	15.4
		N1	80.9	18.1	101.6	43.3	29.1	15.1
		N1	84.2	18.9	105.8	45.1	30.3	15.7
		N2	88.3	17.1	105.6	39.5	29.9	15.2
		N2	86.5	16.8	103.5	38.71	29.3	14.9
		N2	90.1	17.4	107.7	40.29	30.5	15.5
		N3	91.1	14.5	106.5	35.4	27.2	11.9
		N3	89.3	14.2	104.4	34.7	26.7	11.7
		N3	92.9	14.8	108.6	36.1	27.7	12.1
		N4	82.3	13.8	100.5	33.5	27.6	11.9
		N4	80.7	13.5	98.5	32.8	27.1	11.7
		N4	84	14.1	102.5	34.2	28.2	12.1
		N5	70.1	12.7	93	33.7	24.9	10.8
		N5	68.7	12.5	91.1	33	24.4	10.6
		N5	71.5	13	94.9	34.4	25.4	11
	2017	N1	84.2	21.5	95.2	45.2	30.6	20.8
		N1	82.5	21.1	93.3	44.3	30	20.4
		N1	85.9	21.9	97.1	46.1	31.2	21.2
		N2	91.2	19	98.2	40.4	28.8	18.6
		N2	89.4	18.6	96.2	39.6	28.2	18.2
		N2	93	19.4	100.2	41.2	29.4	19
		N3	90.8	16.1	95.3	32.4	25.7	14.7
		N3	89	15.8	93.4	31.8	25.2	14.4
		N3	92.6	16.4	97.2	33.1	26.2	15
		N4	83.6	15.6	89.4	31	26.2	14.3
		N4	81.9	15.3	87.6	30.4	25.7	14
		N4	85.3	15.9	91.2	31.6	26.7	14.6
		N5	73.2	14.5	82.7	29.9	25.7	13.8
		N5	71.7	14.2	81.1	29.3	25.2	13.5
		N5	74.7	14.8	84.4	30.5	26.2	14.1
	Table 2 Raw Data
	Treatments		Translation of nitrogen from vegetative organs to grain after anthesis									Nitrogen accumulation after anthesis
			Leaf			Stem and sheath			Spike axis and grain husk
			NTA	TE	CP	NTA	TE	CP	NTA	TE	CP	NAFA	CP
			kg/ha	%	%	kg/ha	%	%	kg/ha	%	%	kg/ha	%
	2016	N1	64	77.6	34.9	59.5	57.4	32.4	14	47.8	7.7	45.9	25
		N1	62.7	76.1	34.2	58.3	56.3	31.8	13.7	46.8	7.6	45	24.5
		N1	65.3	79.2	35.6	60.7	58.6	33.1	14.3	48.8	7.9	46.8	25.5
		N2	71.2	80.7	35.6	66.1	62.6	33	14.8	49.3	7.4	48	24
		N2	69.78	79.1	34.9	64.8	61.4	32.3	14.5	48.3	7.3	47	23.5
		N2	72.6	82.3	36.3	67.4	63.9	33.7	15.1	50.3	7.6	49	24.5
		N3	76.6	84.1	36.6	71.1	66.7	34	15.3	56.3	7.3	46.2	22.1
		N3	75.1	82.4	35.9	69.7	65.4	33.3	15	55.2	7.2	45.3	21.7
		N3	78.1	85.8	37.3	72.5	68	34.7	15.6	57.4	7.5	47.1	22.5
		N4	68.6	83.3	35.4	67	66.6	34.6	15.7	56.9	8.1	42.4	21.9
		N4	67.2	81.6	34.7	65.7	65.3	33.9	15.4	55.8	7.9	41.6	21.5
		N4	70	85	36.1	68.3	67.9	35.3	16	58	8.3	43.2	22.3
		N5	57.4	81.9	34.6	59.3	63.7	35.7	14.1	56.6	8.5	35.1	21.2
		N5	56.3	80.3	33.9	58.1	62.4	35	13.8	55.5	8.3	34.4	20.8
		N5	58.6	83.5	35.3	60.49	65	36.4	14.4	57.7	8.7	35.8	21.6
	2017	N1	62.7	74.4	37.7	50.1	52.6	30.1	9.8	31.9	5.9	43.8	26.3
		N1	61.5	72.9	36.9	49.1	51.5	29.5	9.6	31.3	5.8	42.9	25.8
		N1	64	75.9	38.5	51.1	53.7	30.7	10	32.5	6	44.7	26.8
		N2	72.2	79.2	38.6	57.8	58.8	30.9	10.1	35.3	5.4	47	25.1
		N2	70.8	77.6	37.8	56.6	57.6	30.3	9.9	34.6	5.3	46.1	24.6
		N2	73.6	80.8	39.4	59	60	31.5	10.3	36	5.5	47.9	25.6
		N3	74.8	82.3	38.2	62.9	66	32.2	11	42.7	5.6	46.9	24
		N3	73.3	80.7	37.4	61.6	64.7	31.6	10.8	41.9	5.5	46	23.5
		N3	76.3	84	39	64.2	67.3	32.8	11.2	43.6	5.7	47.8	24.5
		N4	68	81.4	37.9	58.4	65.4	32.5	12	45.6	6.7	41.2	22.9
		N4	66.6	79.8	37.1	57.2	64.1	31.9	11.8	44.7	6.6	40.4	22.4
		N4	69.4	83	38.7	59.6	66.7	33.2	12.2	46.5	6.8	42	23.4
		N5	58.8	80.3	37.2	52.8	63.9	33.5	11.9	46.3	7.5	34.4	21.8
		N5	57.6	78.7	36.5	51.7	62.6	32.8	11.7	45.4	7.4	33.7	21.4
		N5	60	81.9	37.9	53.9	65.2	34.2	12.1	47.2	7.7	35.1	22.2
	Table 3 Raw Data
	Year	Treatments	Fitting Equation of Grain Nitrogen Filling			R2	Vmax	Vmean	D
	2016	N1	y=1.066/(1+17.876e-0.179x）			0.997	0.048	0.03	33.499
		N2	y=1.065/(1+20.300e-0.178x）			0.995	0.047	0.03	33.636
		N3	y=1.139/(1+17.673e-0.171x）			0.996	0.049	0.032	35.116
		N4	y=1.042/(1+15.842e-0.179x）			0.996	0.047	0.029	33.515
		N5	y=0.991/(1+15.792e-0.185x）			0.992	0.046	0.027	32.473
	2017	N1	y=0.891/(1+14.568e-0.199x）			0.994	0.044	0.025	30.189
		N2	y=0.951/(1+18.322e-0.198x）			0.995	0.047	0.026	30.341
		N3	y=1.005/(1+16.431e-0.192x）			0.997	0.048	0.028	31.235
		N4	y=0.918/(1+18.266e-0.195x）			0.992	0.045	0.025	30.719
		N5	y=0.883/(1+19.249e-0.200x）			0.991	0.044	0.024	30.032
	Table 4 Raw Data
	R	Grain yield	Grain protein yield
	LA	0.857**	0.910**
	LM	﹣0.764*	﹣0.702*
	SA	0.954**	0.933**
	SM	﹣0.534	﹣0.602
	GA	0.708*	0.710*
	GM	﹣0.675	﹣0.605
	LNTA	0.909**	0.951**
	LTE	0.986**	0.989**
	LCP	0.266	0.369
	SNTA	0.990**	0.987**
	STE	0.972**	0.986**
	SCP	0.694	0.638
	GNTA	0.847**	0.793**
	GTE	0.794*	0.931*
	GCP	0.698	0.627
	NAFA	﹣0.043	﹣0.152
	CP	﹣0.672*	﹣0.750*
	NR	0.896**	0.941**
	GS	0.978**	0.984**
	LF	0.989**	0.990**
	GF	0.983**	0.971**
	Vmax	0.879**	0.842**
	Vmean	0.831**	0.777**
	D	0.721*	0.652*
